# Supplementary material for: Myocardial and haemodynamic responses to two fluid regimens in African children with severe malnutrition and hypovolaemic shock (AFRIM study)
Source: PubMed Central journal article supplement (PMC5415747; doi:10.1186/s13054-017-1679-0), 2017-05-03

1(a)

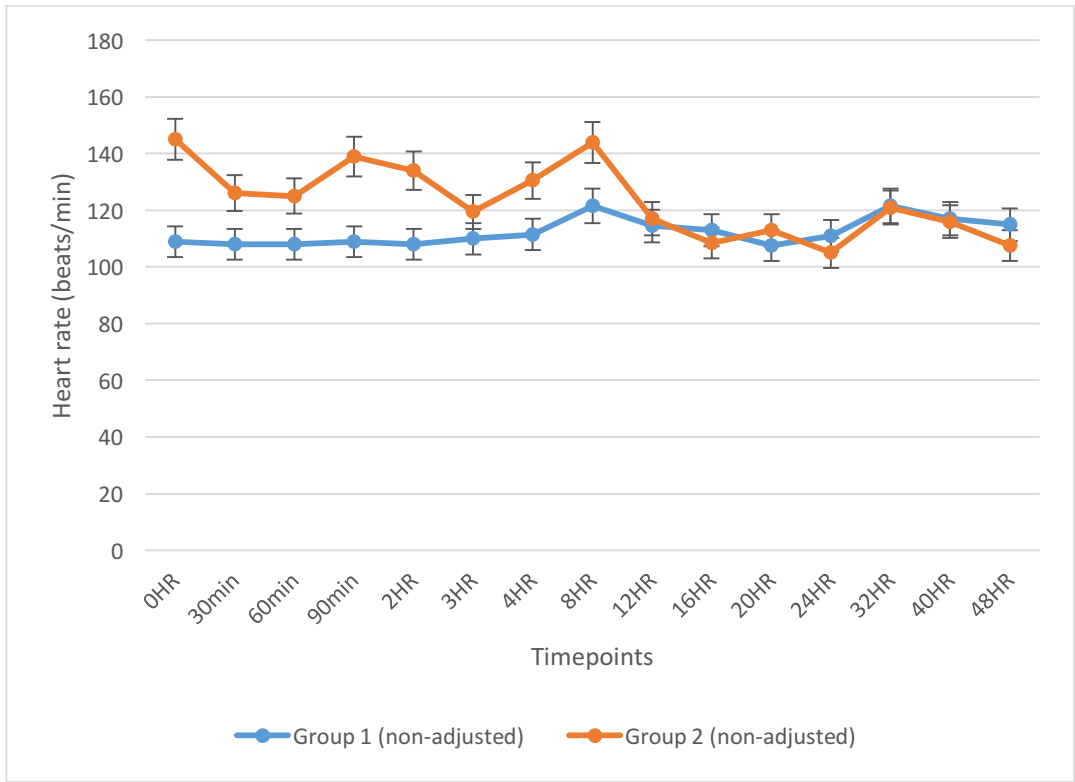

1(b)

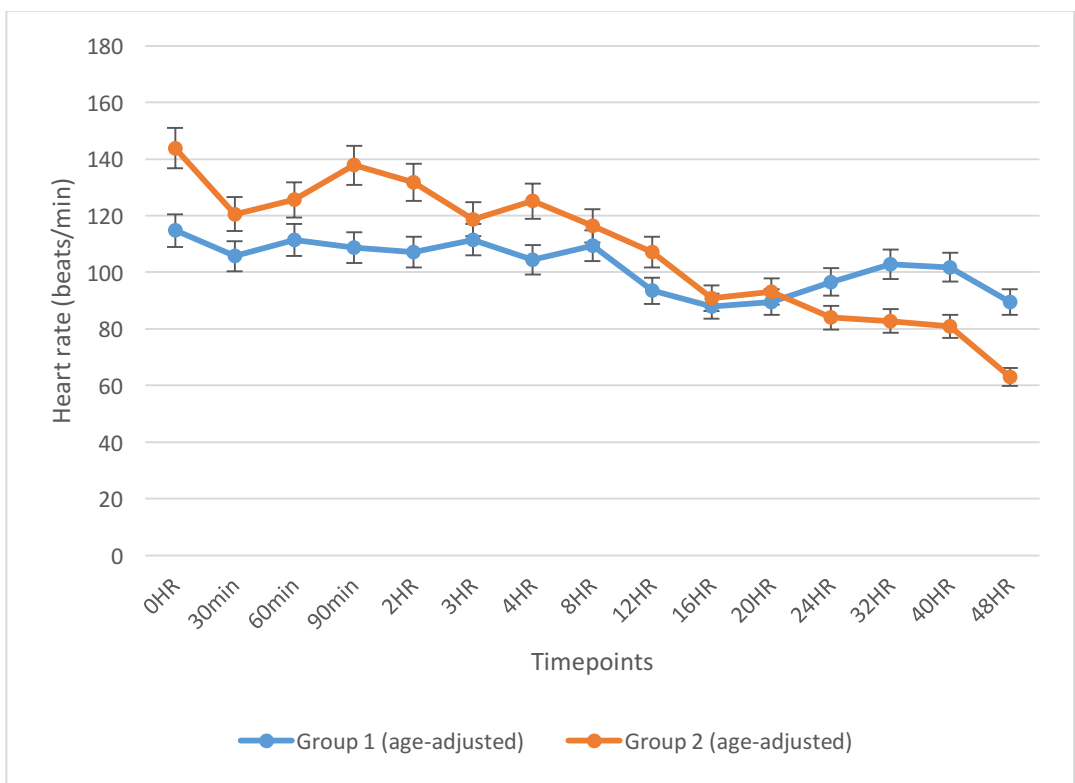

1(c)

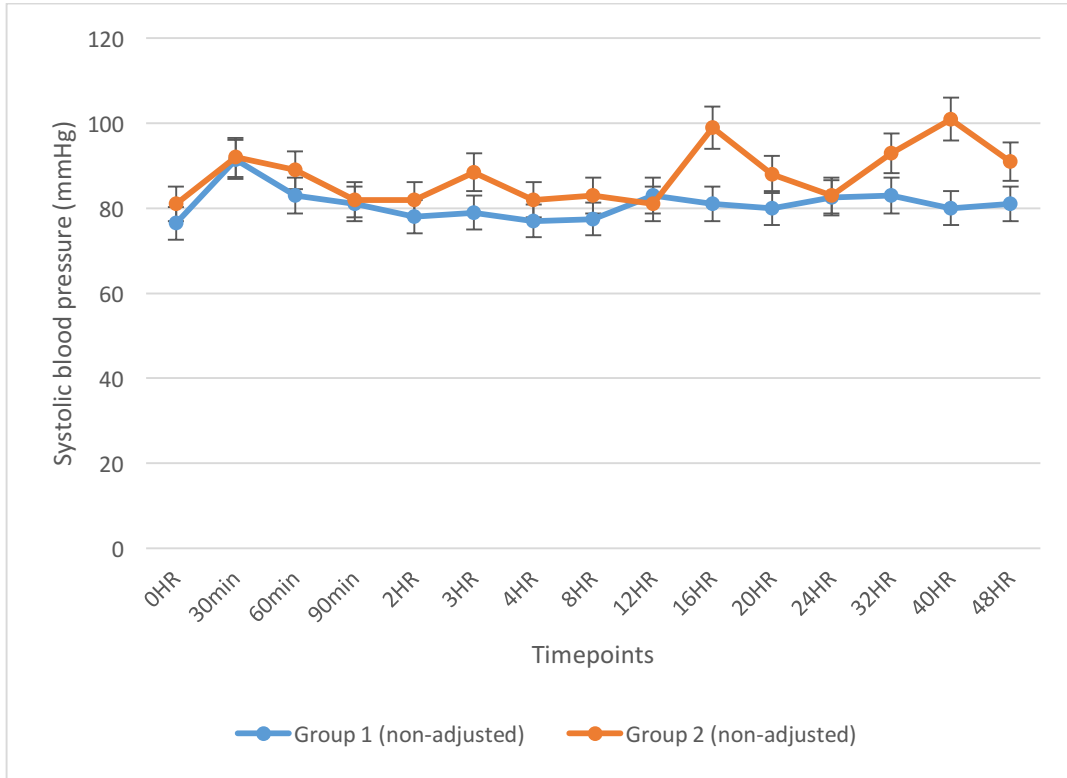

1(d)

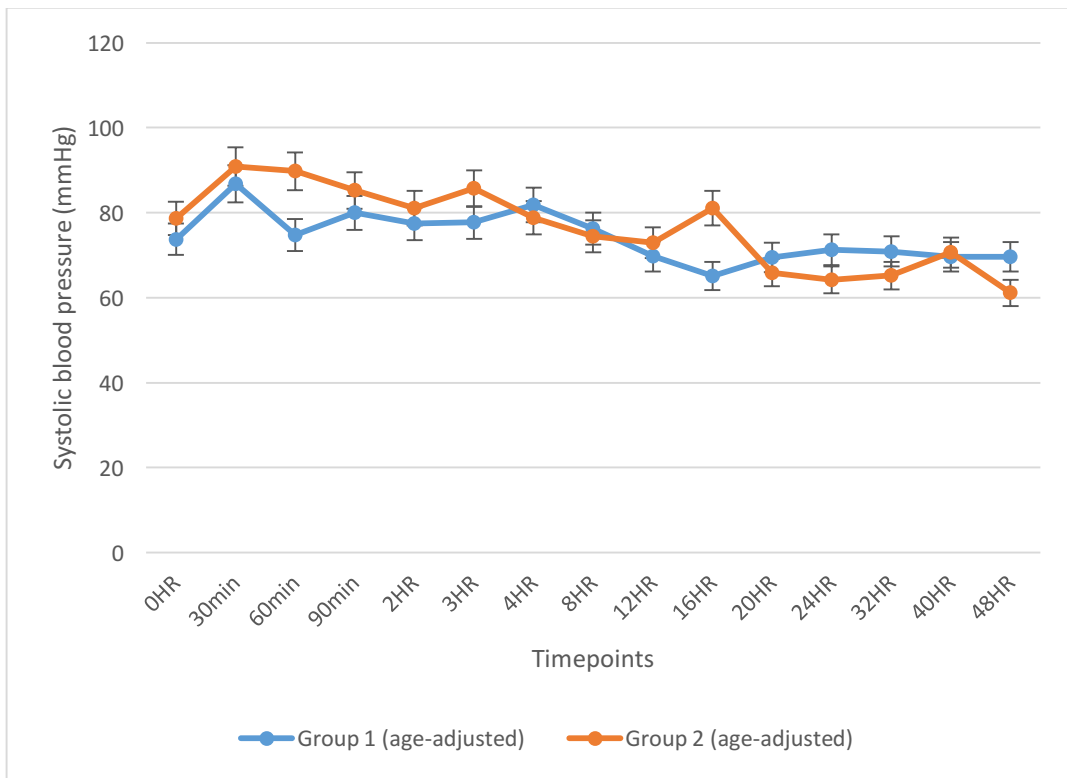

1(e)

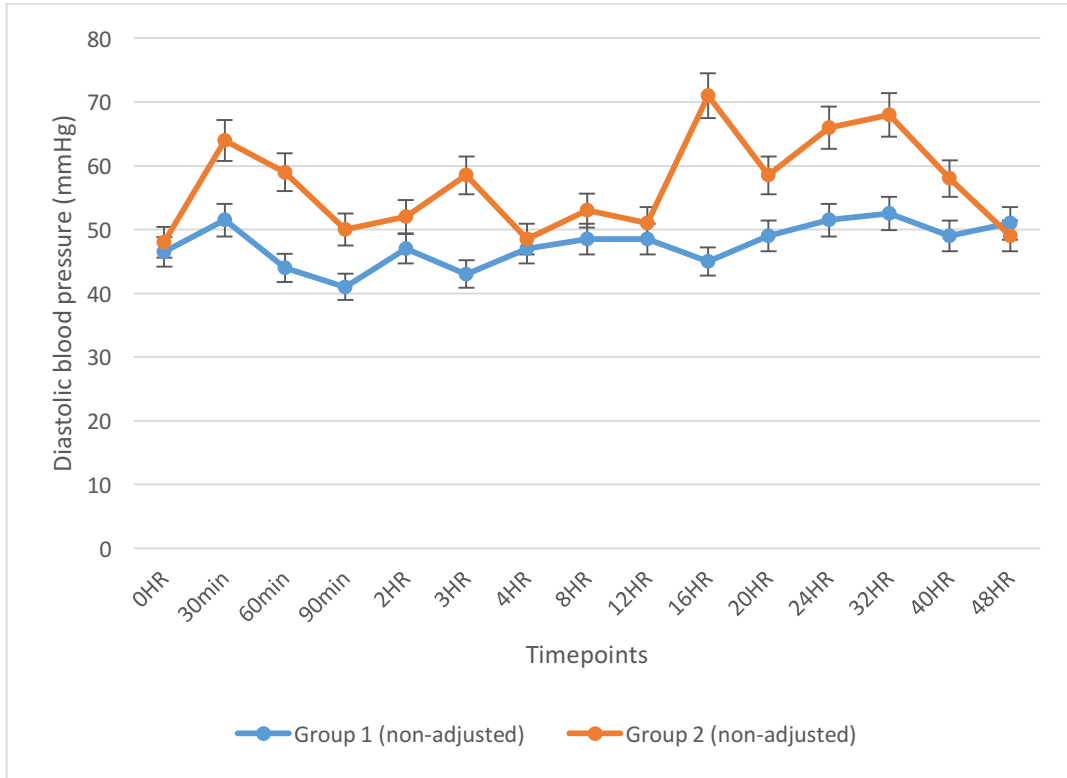

1(f)

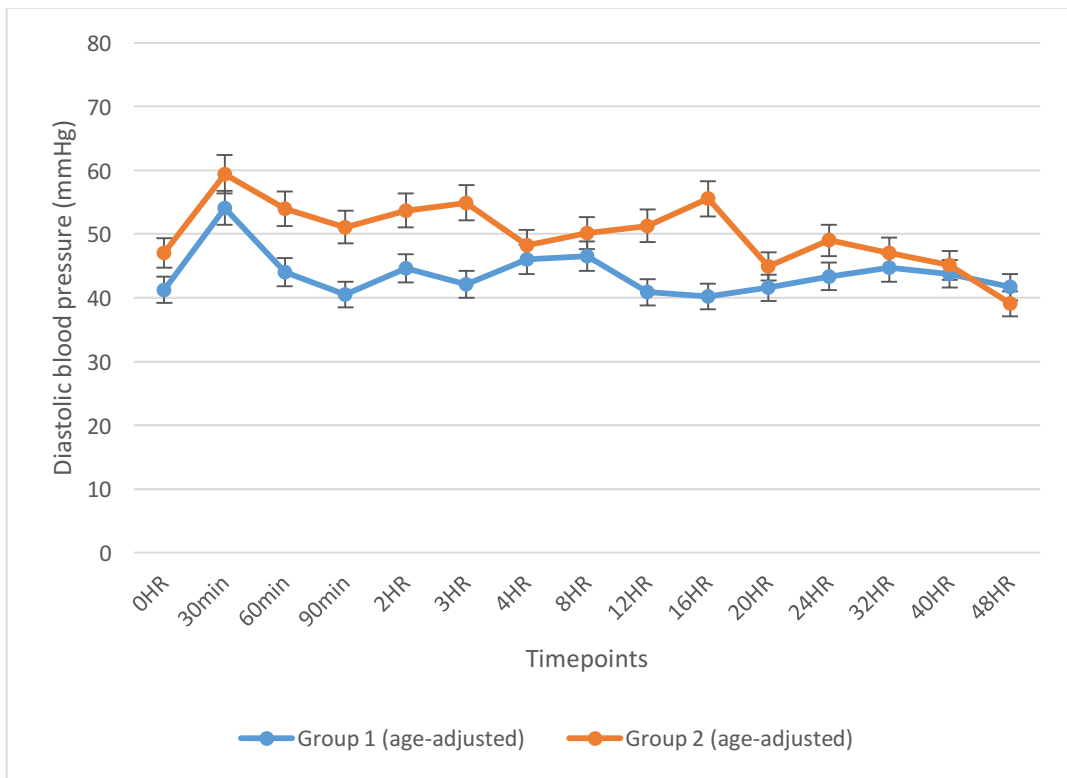

Supplement: 13054_2017_1679_MOESM3_ESM.pdf [file 13054_2017_1679_MOESM3_ESM.pdf]
