# Supplementary material for: Myocardial and haemodynamic responses to two fluid regimens in African children with severe malnutrition and hypovolaemic shock (AFRIM study)
Source: PubMed Central journal article supplement (PMC5415747; doi:10.1186/s13054-017-1679-0), 2017-05-03
Supplement: 13054_2017_1679_MOESM5_ESM.pdf [file 13054_2017_1679_MOESM5_ESM.pdf]

Supplemental Figure 2: Blood test parameters (a) Lactate, (b) Haemoglobin, (c) Potassium, (d) Sodium, (e) White blood cell count, (f) Creatinine

(a)

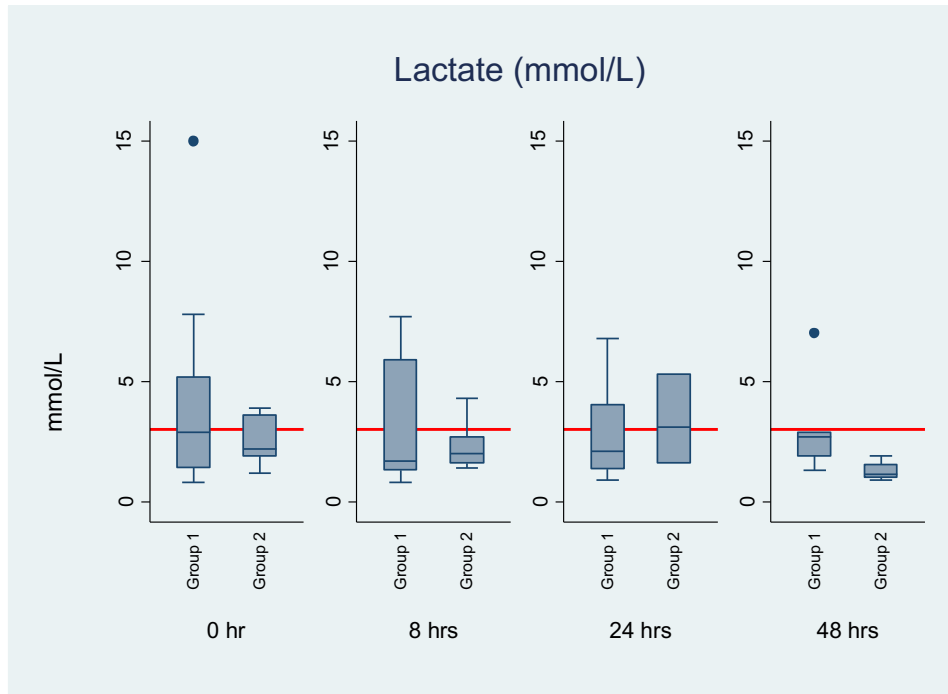

(b)

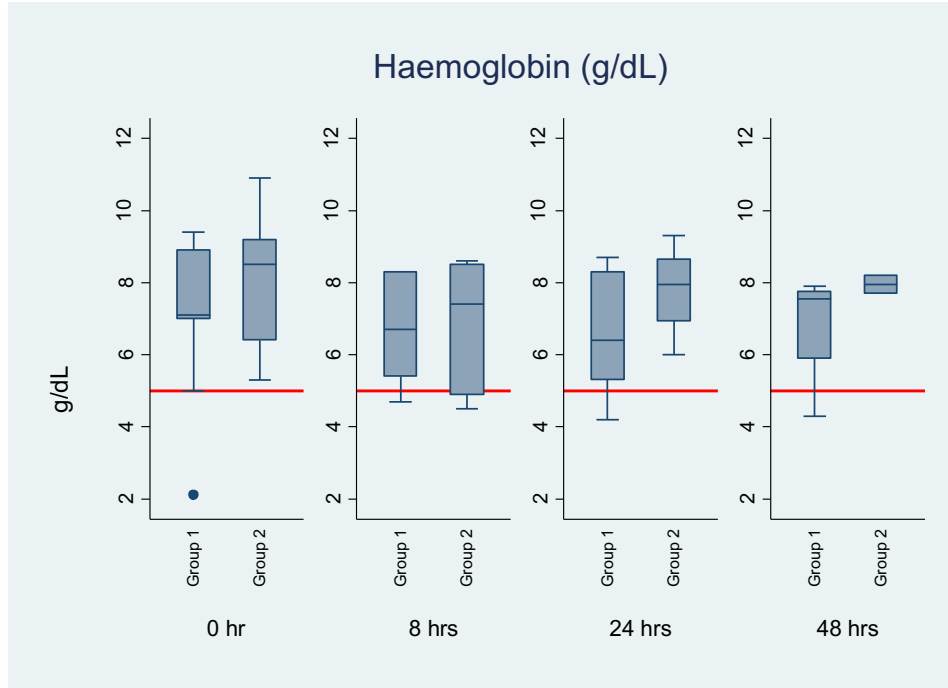

| Blood test parameters | 0-hour  |         | 8-hours |         | 24-hours |         | 48-hours |         |
|-----------------------|---------|---------|---------|---------|----------|---------|----------|---------|
|                       | Group 1 | Group 2 | Group 1 | Group 2 | Group 1  | Group 2 | Group 1  | Group 2 |
| n                     | 11      | 9       | 11      | 7       | 8        | 5       | 6        | 5       |

(c)

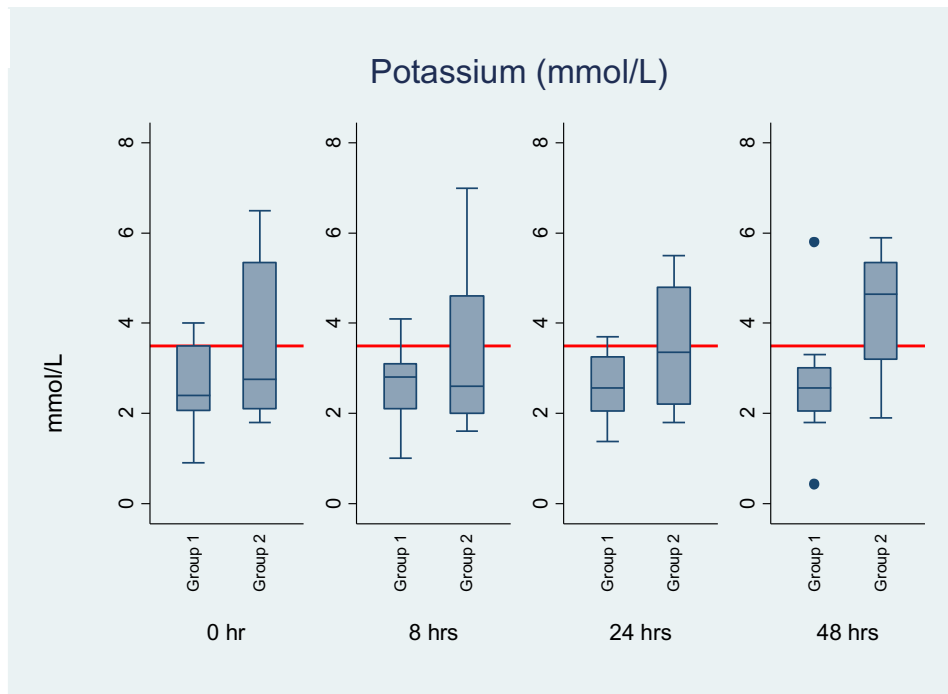

(d)

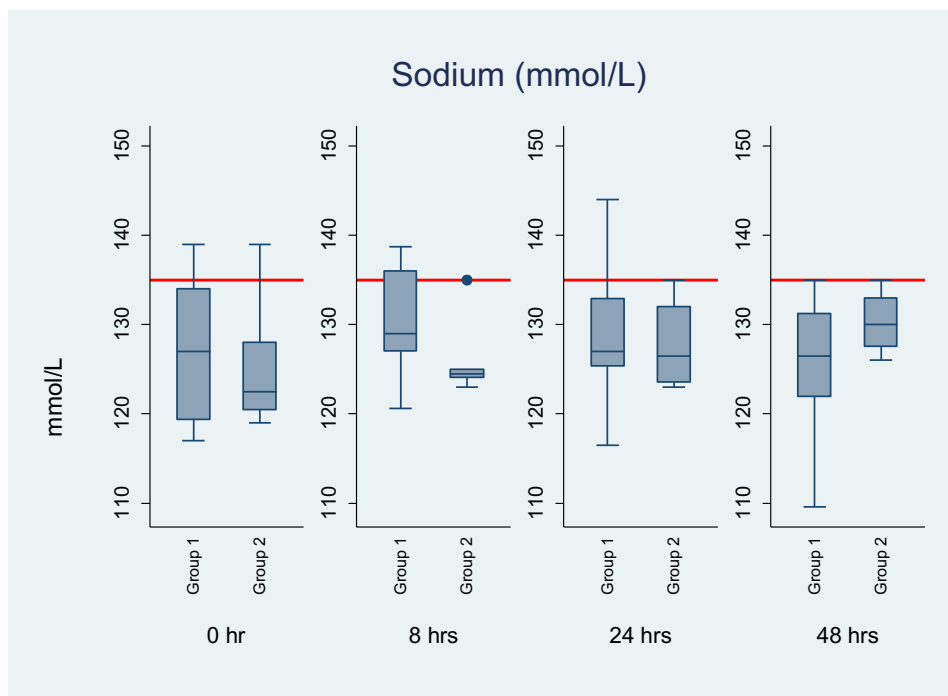

| Blood test parameters | 0-hour  |         | 8-hours |         | 24-hours |         | 48-hours |         |
|-----------------------|---------|---------|---------|---------|----------|---------|----------|---------|
|                       | Group 1 | Group 2 | Group 1 | Group 2 | Group 1  | Group 2 | Group 1  | Group 2 |
| n                     | 11      | 9       | 11      | 7       | 8        | 5       | 6        | 5       |

(e)

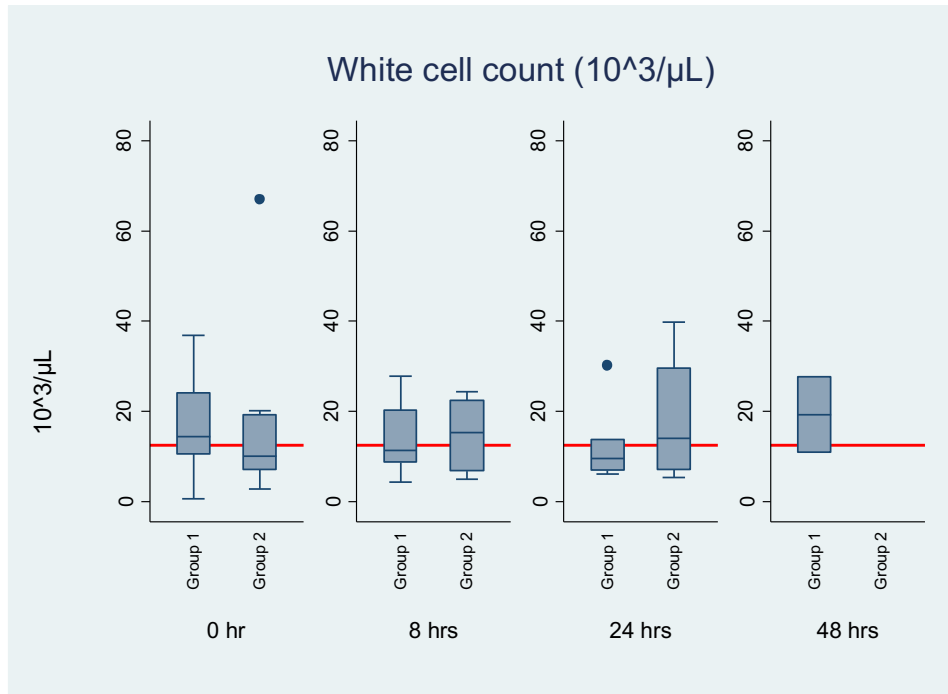

(f)

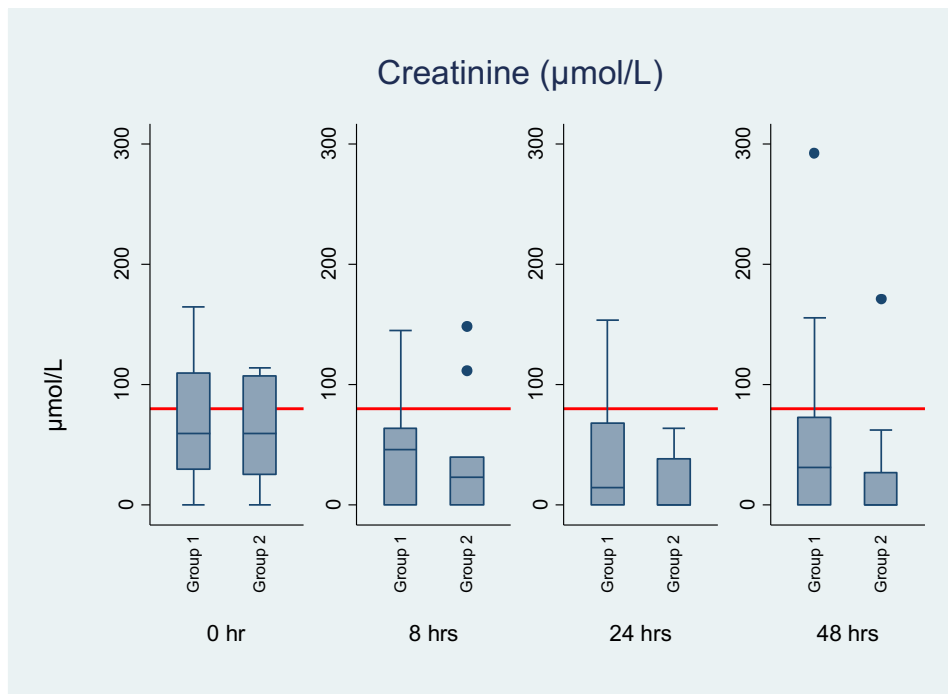

| Blood test parameters | 0-hour  |         | 8-hours |         | 24-hours |         | 48-hours |         |
|-----------------------|---------|---------|---------|---------|----------|---------|----------|---------|
|                       | Group 1 | Group 2 | Group 1 | Group 2 | Group 1  | Group 2 | Group 1  | Group 2 |
| n                     | 11      | 9       | 11      | 7       | 8        | 5       | 6        | 5       |
