# Supplementary material for: Myocardial and haemodynamic responses to two fluid regimens in African children with severe malnutrition and hypovolaemic shock (AFRIM study)
Source: Springer Nature journal article supplement (doi:10.1186/s13054-017-1679-0), 2017-05-03
Supplement: MOESM4 [file 12262280]

Supplemental table 2: Blood measurements, median and inter-quartile range at different time points by study group

| Parameter                            | Bolus + rehydration group |                |                |                 | Rehydration-only group |                |                |               |
|--------------------------------------|---------------------------|----------------|----------------|-----------------|------------------------|----------------|----------------|---------------|
|                                      | 0-hr                      | 8-hrs          | 24-hrs         | 48-hrs          | 0-hr                   | 8-hrs          | 24-hrs         | 48-hrs        |
| <b>Haemoglobin (g/dl)</b>            | 7.1                       | 6.7            | 6.4            | 7.6             | 8.5                    | 7.4            | 8.0            | 8.0           |
| <b>Median, (IQR), n</b>              | (7, 8.9), 9               | (5.7, 8), 7    | (5.7, 8.2), 7  | (6.7, 7.7), 4   | (6.4, 9.2), 9          | (5.4, 8.4), 5  | (7.4, 8.3), 4  | (7.8, 8.1), 2 |
| Severe anaemia<br>n, (%)             | 2, (22%)                  | 2, (29%)       | 2, (29%)       | 0, (0%)         | 2, (22%)               | 3, (60%)       | 0, (0%)        | 0, (0%)       |
| <b>WBC count (10<sup>3</sup>/μL)</b> | 14.4                      | 11.3           | 9.5            | 19.3            | 10.0                   | 15.4           | 14.1           |               |
| <b>Median, (IQR), n</b>              | (10.6, 24.1), 9           | (9.8, 17.3), 9 | (7.4, 12.7), 6 | (15.1, 23.5), 2 | (7.9, 18.9), 8         | (7.4, 22.2), 8 | (7.9, 24.5), 4 | n/a           |
| Leucocytosis<br>n, (%)               | 6, (67%)                  | 6, (67%)       | 2, (33%)       | 1, (50%)        | 2, (25%)               | 3, (38%)       | 3, (75%)       | n/a           |
| <b>Platelets (10<sup>3</sup>/μL)</b> | 98                        | 116            | 87             | 267             | 87                     | 139            | 79             |               |
| <b>Median, (IQR), n</b>              | (73, 381), 9              | (73, 268), 7   | (85, 290), 6   | (261, 274), 2   | (52, 135), 8           | (58, 179), 6   | (40, 119), 4   | n/a           |
| Thrombocytopenia<br>n, (%)           | 5, (56%)                  | 4, (57%)       | 4, (67%)       | 1, (50%)        | 6, (75%)               | 3, (50%)       | 4, (100%)      | n/a           |
| <b>Sodium (mmol/l)</b>               | 127                       | 129            | 127            | 127             | 123                    | 125            | 127            | 130           |
| <b>Median, (IQR), n</b>              | (121, 133), 11            | (127, 136), 9  | (126, 132), 8  | (123, 130), 8   | (121, 127), 8          | (124, 125), 6  | (124, 131), 4  | (128, 132), 4 |
| Hypernatraemia<br>n, (%)             | 0, (0%)                   | 0, (0%)        | 1, (13%)       | 0, (0%)         | 0, (0%)                | 0, (0%)        | 0, (0%)        | 0, (0%)       |
| Hyponatraemia<br>n, (%)              | 4, (36%)                  | 2, (22%)       | 1, (13%)       | 1, (13%)        | 5, (63%)               | 2, (33%)       | 3, (75%)       | 0, (0%)       |
| <b>Potassium (mmol/l)</b>            | 2.4                       | 2.8            | 2.6            | 2.6             | 2.8                    | 2.6            | 3.4            | 4.7           |
| <b>Median, (IQR), n</b>              | (2.1, 3.3), 10            | (2.1, 3.1), 9  | (2.2, 3.1), 8  | (2.2, 2.9), 8   | (2.2, 5.0), 8          | (2.2, 4.1), 6  | (2.4, 4.5), 4  | (3.9, 5.1), 4 |
| Hypokalaemia<br>n, (%)               | 4, (40%)                  | 3, (33%)       | 3 (38%)        | 1, (13%)        | 3, (38%)               | 1, (17%)       | 2, (50%)       | 0, (0%)       |
| <b>Creatinine (μmol/l)</b>           | 63                        | 56             | 58             | 47              | 65                     | 39             | 42             | 44            |
| <b>Median, (IQR), n</b>              | (42, 104), 10             | (44, 71), 8    | (38, 87), 6    | (35, 114), 7    | (39, 107), 8           | (27, 93), 6    | (34, 50), 4    | (24, 89), 4   |
| Hypercreatininaemia<br>n, (%)        | 4, (40%)                  | 2, (25%)       | 2 (33%)        | 2 (29%)         | 3, (38%)               | 1, (17%)       | 1, (25%)       | 0, (0%)       |
| <b>Blood glucose (mmol/l)</b>        | 6.0                       | 8.3            | 8.6            | 6.0             | 2.2                    | 5.7            | 7.2            | 4.7           |
| <b>Median, (IQR), n</b>              | (4.9, 6.8), 8             | (6.3, 10.7), 4 | (8.3, 9.3), 5  | (4.9, 6.5), 4   | (1.8, 3.9), 8          | (4.2, 8.7), 5  | (7, 7.3), 2    | (4.1, 5.3), 2 |
| Hypoglycaemia<br>n, (%)              | 1, (13%)                  | 1, (25%)       | 0, (0%)        | 0, (0%)         | 5, (63%)               | 2, (40%)       | 0, (0%)        | 0, (0%)       |
| <b>Lactate (mmol/l)</b>              | 2.9                       | 1.7            | 2.1            | 2.7             | 2.2                    | 2.0            | 3.1            | 1.2           |
| <b>Median, (IQR), n</b>              | (1.4, 5.2), 9             | (1.3, 5.9), 9  | (1.5, 3.7), 8  | (1.9, 2.9), 5   | (1.9, 3.6), 9          | (1.7, 2.5) 6   | (2.4, 4.2), 3  | (1.1, 1.4), 4 |
| Hyperlactataemia<br>n, (%)           | 4, (44%)                  | 3, (33%)       | 3, (38%)       | 1, (20%)        | 3, (33%)               | 2, (33%)       | 2, (67%)       | 0, (0%)       |

Severe anaemia (haemoglobin <5g/dL); leucocytosis (white blood cell count >12.5 x10<sup>3</sup>/μL); thrombocytopenia (platelet count < 159 x10<sup>3</sup>/μL); severe hyponatraemia (sodium level <125mmol/L); severe hypokalaemia (potassium level <2.5mmol/L); hypercreatininaemia (creatinine level ≥ 80μmol/L); hypoglycaemia (blood glucose level <3mmol/L); hyperlactataemia (lactate level ≥ 3mmol/L).
