# Supplementary material for: Myocardial and haemodynamic responses to two fluid regimens in African children with severe malnutrition and hypovolaemic shock (AFRIM study)
Source: Springer Nature journal article supplement (doi:10.1186/s13054-017-1679-0), 2017-05-03
Supplement: MOESM6 [file 12262280]

Supplemental table 3: Cardiac bio-markers medians, inter-quartile ranges and standard deviation at admission and 48-hours by study group

| Parameter                | Bolus + rehydration group |                   |         |         |                   |         | Rehydration-only group |                   |         |         |                  |         |
|--------------------------|---------------------------|-------------------|---------|---------|-------------------|---------|------------------------|-------------------|---------|---------|------------------|---------|
|                          | Pre-fluid                 |                   |         | 48-hour |                   |         | Pre-fluid              |                   |         | 48-hour |                  |         |
|                          | N                         | Median,<br>(IQR)  | Std.dev | n       | Median,<br>(IQR)  | Std.dev | n                      | Median,<br>(IQR)  | Std.dev | n       | Median,<br>(IQR) | Std.dev |
| BNP* (pg/ml)             | 10                        | 336<br>(131, 540) | 520     | 5       | 322<br>(317, 359) | 437     | 9                      | 168<br>(117, 214) | 76      | 3       | 0<br>(0, 162)    | 93      |
| BNP > 300pg/ml<br>n, (%) | 6                         | (60%)             |         | 4       | (57%)             |         | 2                      | (22%)             |         | 0       | (0%)             |         |
| Troponin I* (pg/ml)      | 10                        | 0<br>(0, 443)     | 327     | 5       | 0<br>(0, 369)     | 165     | 3                      | 0<br>(0, 370)     | 336     | 3       | 0<br>(0, 399)    | 230     |

BNP, brain natriuretic peptide; IQR, inter-quartile range

\*BNP and Troponin I measurements were sampled at admission (baseline) and 48 hours only
