# Supplementary material for: Myocardial and haemodynamic responses to two fluid regimens in African children with severe malnutrition and hypovolaemic shock (AFRIM study)
Source: Springer Nature journal article supplement (doi:10.1186/s13054-017-1679-0), 2017-05-03

Supplemental figure 4: Kaplan-Meier survival estimates at (a) 48 hours and (b) Day 28 by study group

(a)

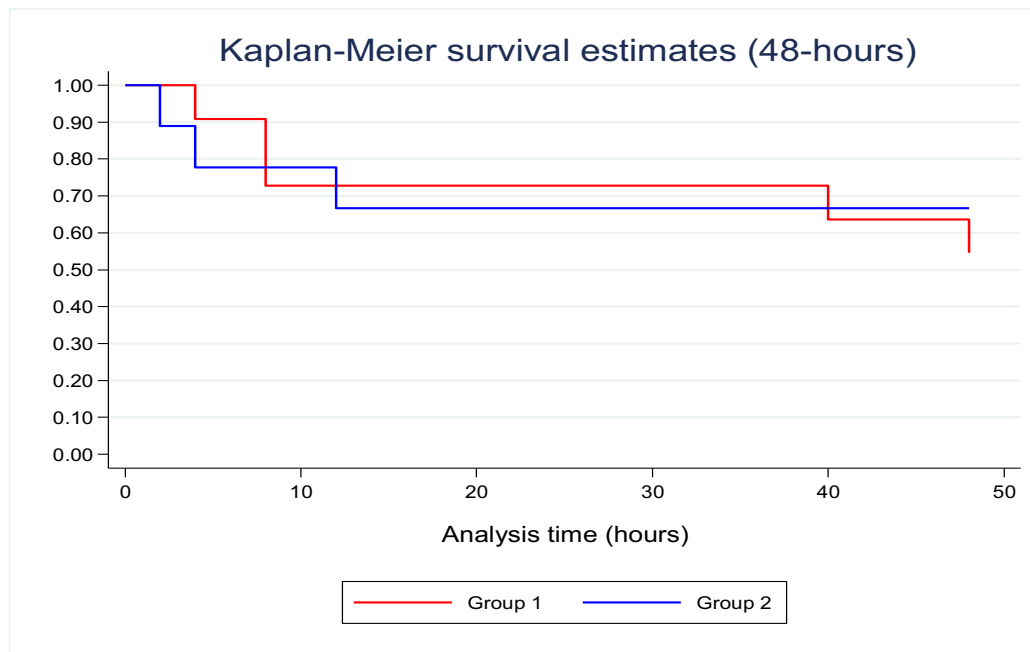

(b)

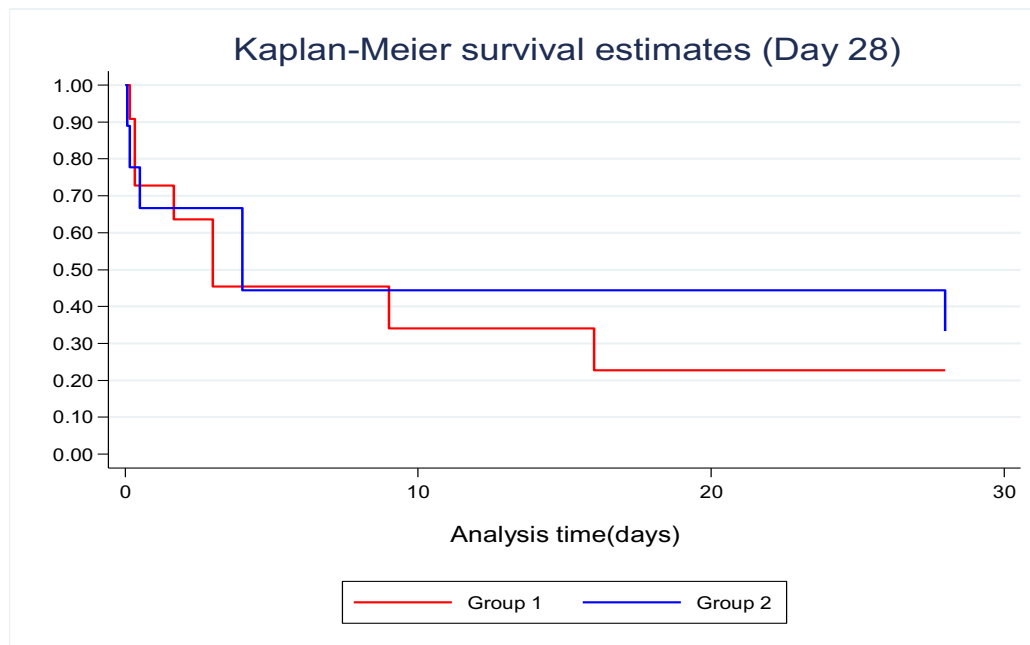

Supplement: MOESM9 [file 12262280]
